# Supplementary material
Source: PubMed Central journal article supplement (PMC3807712)
Supplement: Supp_Fig1.pdf [file Supp_Fig1.pdf]

## Supplementary Data

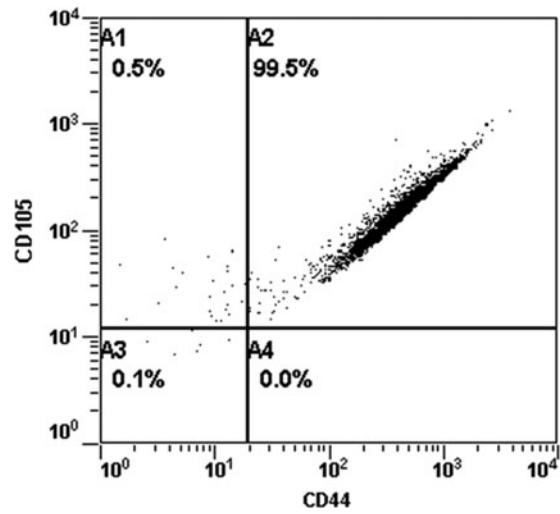

**SUPPLEMENTARY FIG. S1.** Flow cytometry analysis of cell surface markers CD44 and CD105 in P6 adipose-derived stem cells (ADSCs). The cells were still >95% positive for both markers at passage 6, indicating maintenance of stemness.
