# Supplementary material
Source: PubMed Central journal article supplement (PMC3807712)
Supplement: Supp_Fig2.pdf [file Supp_Fig2.pdf]

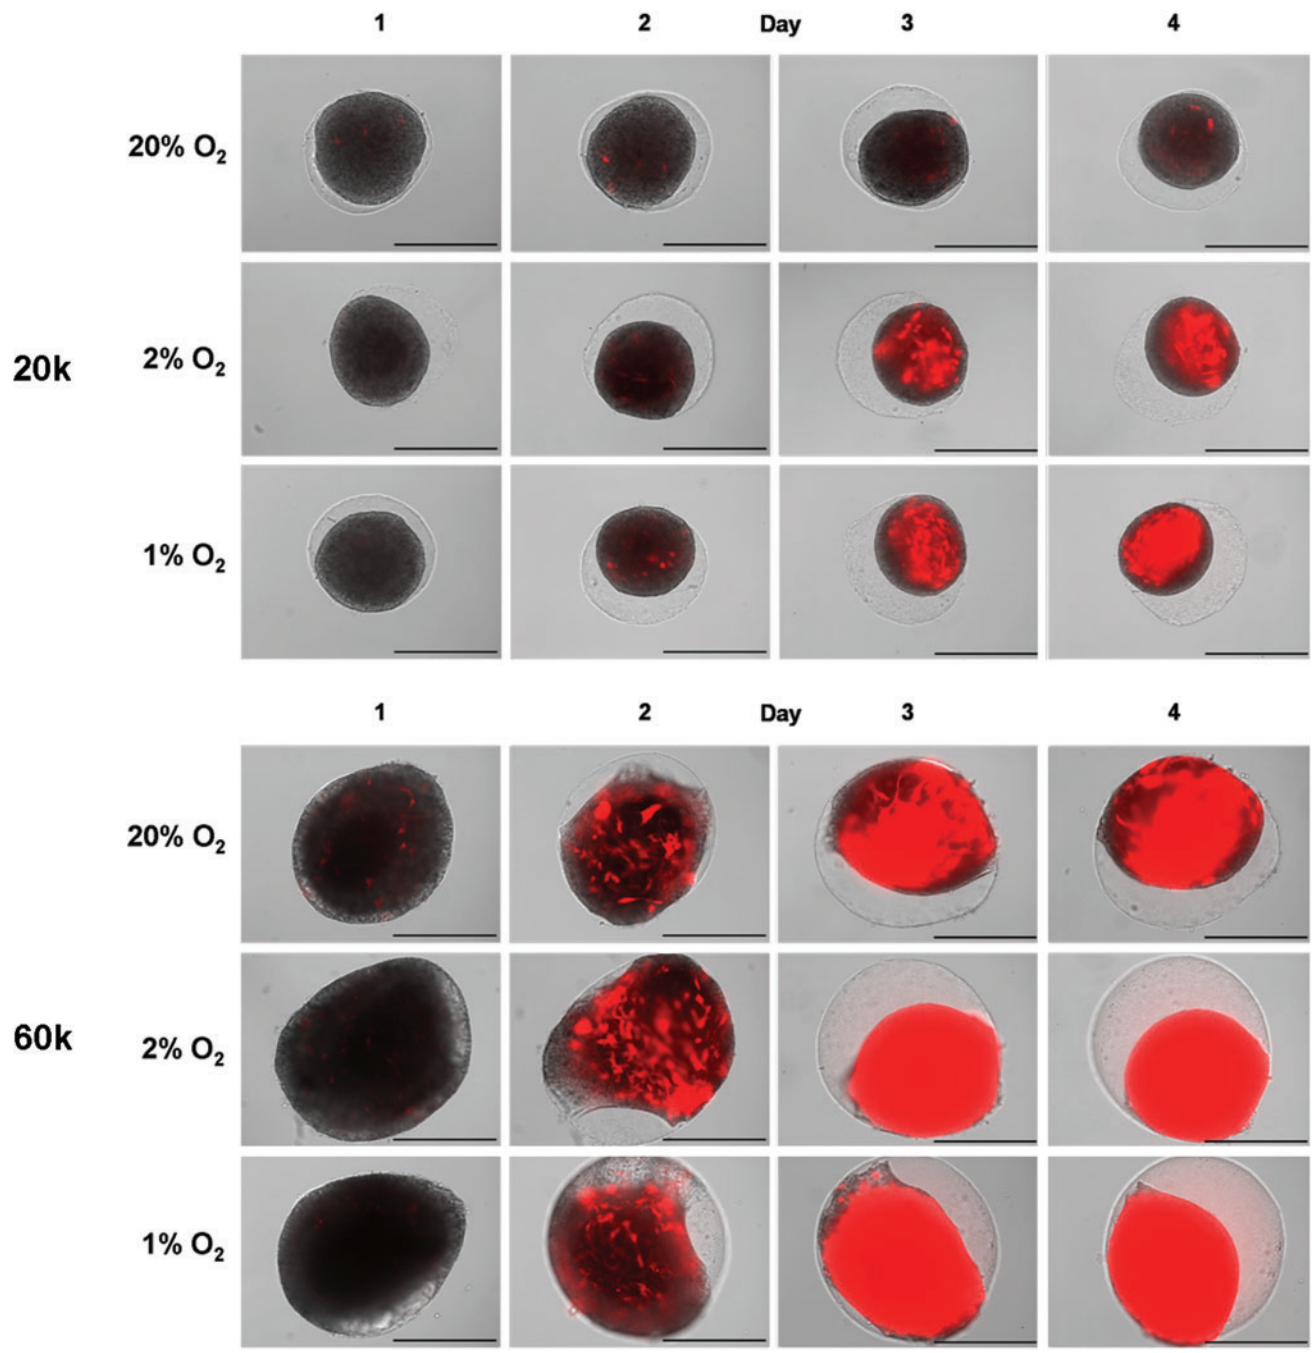

**SUPPLEMENTARY FIG. S2.** Fluorescent hypoxia-inducible transcription factor reporter signal displayed at 1/5 the exposure length as in Figure 2 for 20k and 60k spheroids. Differences in signal intensity between samples that were lost due to over-saturation are better resolved at the lower exposure. Overexposure is still observed in 60k Day 3 and 4 spheroids. Scale bar = 500  $\mu$ m.
