# Supplementary material
Source: PubMed Central journal article supplement (PMC3807712)
Supplement: Supp_Table1.pdf [file Supp_Table1.pdf]

SUPPLEMENTARY TABLE S1. TABLE INDICATING STATISTICAL SIGNIFICANCE OF DIFFERENCES IN MEAN VASCULAR ENDOTHELIAL GROWTH FACTOR RELEASE FROM THE CULTURES UNDER STUDY

**Statistical Significance**

| vs.             |      | 5k  | 10k | 20k | 60k | vs. |    |    |    |    |    |    |    |    |    |    |    |    |    |    |           |                 |    |    |    |    |           |           |    |    |    |    |          |          |   |   |   |   |    |
|-----------------|------|-----|-----|-----|-----|-----|----|----|----|----|----|----|----|----|----|----|----|----|----|----|-----------|-----------------|----|----|----|----|-----------|-----------|----|----|----|----|----------|----------|---|---|---|---|----|
| %O <sub>2</sub> | Size | Day |     |     |     |     |    |    |    |    |    |    |    |    |    |    |    |    |    |    |           | %O <sub>2</sub> | 1  | 2  | 3  | 4  | 5         |           |    |    |    |    |          |          |   |   |   |   |    |
|                 |      | 1   | 2   | 3   | 4   | 5   | 1  | 2  | 3  | 4  | 5  | 1  | 2  | 3  | 4  | 5  |    |    |    |    |           |                 |    |    |    |    |           |           |    |    |    |    |          |          |   |   |   |   |    |
| 20%             | ML   | *   | **  |     |     |     | ** | *  |    |    |    | ** | *  |    |    |    | ** | ** | *  |    |           | 20% v. 2%       | ** | ** | ** | ** | **        | 20% v. 1% | ** | ** | ** | ** | *        | 2% v. 1% | * | * |   |   | ** |
| 2%              |      | **  | *   |     |     |     |    | *  | ** | ** | ** | ** | ** | ** | ** | ** | ** | ** | *  |    |           | 20% v. 2%       | ** | ** | ** | ** | **        | 20% v. 1% | ** | ** | ** | ** | **       | 2% v. 1% | * | * |   |   |    |
| 1%              |      | **  |     |     | *   |     | ** | ** | ** | ** | ** | ** | ** | ** | ** | ** | ** | ** | *  | ** | *         | 20% v. 2%       | ** | ** | ** | ** | **        | 20% v. 1% | ** | ** | ** | ** | **       | 2% v. 1% | * | * |   |   |    |
| 20%             | 5k   |     |     |     |     |     | ** | ** |    |    |    | ** | ** |    | *  | ** | ** | *  | *  | *  | 20% v. 2% | **              | ** | ** | ** | ** | 20% v. 1% | **        | ** | ** | ** | ** | 2% v. 1% | *        | * |   |   |   |    |
| 2%              |      |     |     |     |     |     | ** | ** | ** | ** | ** | ** | ** | ** | *  | ** | ** | *  | *  | *  | 20% v. 2% | **              | ** | ** | ** | ** | 20% v. 1% | **        | ** | ** | ** | ** | 2% v. 1% | *        | * |   |   |   |    |
| 1%              |      | **  | **  | **  | **  | *   | ** | ** | ** | ** | ** | ** | ** | ** | *  | ** | ** | *  | *  | *  | 20% v. 2% | **              | ** | ** | ** | ** | 20% v. 1% | **        | ** | ** | ** | ** | 2% v. 1% | *        | * |   |   |   |    |
| 20%             | 10k  |     |     |     |     |     |    |    |    |    |    | ** | ** | ** | ** | ** | ** | ** | ** | ** | 20% v. 2% | **              | ** | ** | ** | ** | 20% v. 1% | **        | ** | ** | ** | ** | 2% v. 1% |          |   |   |   |   |    |
| 2%              |      |     |     |     |     |     | ** | ** | ** | ** | *  | ** | ** | ** | *  | ** | ** | *  | *  | *  | 20% v. 2% | **              | ** | ** | ** | ** | 20% v. 1% | **        | ** | ** | ** | ** | 2% v. 1% |          |   |   |   |   |    |
| 1%              |      | **  | **  | **  | **  | *   | ** | ** | ** | ** | *  | ** | ** | ** | *  | ** | ** | *  | *  | *  | 20% v. 2% | **              | ** | ** | ** | ** | 20% v. 1% | **        | ** | ** | ** | ** | 2% v. 1% |          |   |   |   |   |    |
| 20%             | 20k  |     |     |     |     |     |    |    |    |    |    | ** | *  | ** | ** | ** | *  | ** | ** | ** | 20% v. 2% | **              | ** | ** | ** | ** | 20% v. 1% | **        | ** | ** | ** | ** | 2% v. 1% |          |   |   |   |   |    |
| 2%              |      |     |     |     |     |     | ** | *  | ** | ** | *  | ** | *  | ** | ** | ** | *  | ** | ** | ** | 20% v. 2% | **              | ** | ** | ** | ** | 20% v. 1% | **        | ** | ** | ** | ** | 2% v. 1% |          |   |   |   |   |    |
| 1%              |      | **  | *   | **  | **  | *   | ** | *  | ** | ** | *  | ** | *  | ** | ** | ** | *  | ** | ** | ** | 20% v. 2% | **              | ** | ** | ** | ** | 20% v. 1% | **        | ** | ** | ** | ** | 2% v. 1% |          |   |   |   |   |    |
| 20%             | 60k  |     |     |     |     |     |    |    |    |    |    | ** | *  | ** | ** | ** | *  | ** | ** | ** | 20% v. 2% | **              | ** | *  | *  | ** | 20% v. 1% | **        | ** | *  | ** | ** | 2% v. 1% | **       | * | * | * | * |    |
| 2%              |      |     |     |     |     |     | ** | *  | ** | ** | *  | ** | *  | ** | ** | ** | *  | ** | ** | ** | 20% v. 2% | **              | ** | *  | *  | ** | 20% v. 1% | **        | ** | *  | ** | ** | 2% v. 1% | **       | * | * | * | * |    |
| 1%              |      | **  | *   | **  | **  | *   | ** | *  | ** | ** | *  | ** | *  | ** | ** | ** | *  | ** | ** | ** | 20% v. 2% | **              | ** | *  | *  | ** | 20% v. 1% | **        | ** | *  | ** | ** | 2% v. 1% | **       | * | * | * | * |    |

  

|               |
|---------------|
| ** = p ≤ 0.01 |
| * = p ≤ 0.05  |

  

| Total | 20% |    |    |   |   | 2% |    |    |   |   | 1% |    |    |   |   | vs.             |    |    |    |    |    |
|-------|-----|----|----|---|---|----|----|----|---|---|----|----|----|---|---|-----------------|----|----|----|----|----|
|       | 60  | 20 | 10 | 5 | k | 60 | 20 | 10 | 5 | k | 60 | 20 | 10 | 5 | k | %O <sub>2</sub> | 60 | 20 | 10 | 5  | ML |
| ML    | *   | *  | ** | * | * | ** | ** | ** | * | * | ** | *  | ** | * | * | 20% v. 2%       | ** | ** | ** | ** | ** |
| 5     | **  | ** | *  | * | * | ** | *  | *  | * | * | ** | *  | *  | * | * | 20% v. 1%       | ** | ** | ** | ** | ** |
| 10    | **  | *  | *  | * | * | ** | *  | *  | * | * | ** | *  | *  | * | * | 2% v. 1%        |    |    |    |    |    |
| 20    | **  | *  | *  | * | * | ** | *  | *  | * | * | ** | *  | *  | * | * |                 |    |    |    |    |    |
| k     |     |    |    |   |   |    |    |    |   |   |    |    |    |   |   |                 |    |    |    |    |    |

\*\*indicates statistical significance at p ≤ 0.01. \*indicates statistical significance at p ≤ 0.05.
